# Supplementary material
Source: Royal Society of Chemistry journal article supplement (doi:10.1039/d6dt00318d)
Supplement: d6dt00318d1.pdf [file d6dt00318d1.pdf]

Supplemental Materials for “Computational design of new DUV NLO fluorooxoborates  
with  $[\text{BO}_3]:[\text{BO}_3\text{F}] = 2:1$  via anionic framework dimensionality-fixed strategy”

Table S1. Basic parameters and  $E_{\text{hull}}$  of  $\text{CaB}_3\text{O}_5\text{F}$ -I-IV and  $\text{CaB}_6\text{O}_9\text{F}_2$ -I.

Table S2-I. Crystallographic structural data of  $\text{CaB}_6\text{O}_9\text{F}_2$ -I

Table S2-II. Crystallographic structural data of  $\text{CaB}_3\text{O}_5\text{F}$ -I.

Table S2-III. Crystallographic structural data of  $\text{CaB}_3\text{O}_5\text{F}$ -II.

Table S2-IV. Crystallographic structural data of  $\text{CaB}_3\text{O}_5\text{F}$ -III.

Table S2-V. Crystallographic structural data of  $\text{CaB}_3\text{O}_5\text{F}$ -IV.

Table S3-I. Bond lengths (Å) and angles (°) for  $\text{CaB}_6\text{O}_9\text{F}_2$ -I.

Table S3-II. Bond lengths (Å) and angles (°) for  $\text{CaB}_3\text{O}_5\text{F}$ -I.

Table S3-III. Bond lengths (Å) and angles (°) for  $\text{CaB}_3\text{O}_5\text{F}$ -II.

Table S3-IV. Bond lengths (Å) and angles (°) for  $\text{CaB}_3\text{O}_5\text{F}$ -III.

Table S3-V. Bond lengths (Å) and angles (°) for  $\text{CaB}_3\text{O}_5\text{F}$ -IV.

Table S4. Comparison of key NLO properties between the predicted structures and  
representative DUV/UV materials.

Table S5.  $\Delta\rho^b$ , group contribution and corresponding birefringence of  $\text{CaB}_6\text{O}_9\text{F}_2$ -I and  
 $\text{CaB}_3\text{O}_5\text{F}$ -I-IV.

Table S6. Contributions of the respective groups to birefringence and SHG coefficients in  
 $\text{CaB}_6\text{O}_9\text{F}_2$ -I and  $\text{CaB}_3\text{O}_5\text{F}$ -I-IV.

Figure S1. Phonon spectra of (a-d)  $\text{CaB}_3\text{O}_5\text{F}$ -I-IV and (e)  $\text{CaB}_6\text{O}_9\text{F}_2$ -I.

Figure S2. Fluorooxoborates structures of (a)  $\text{CaB}_3\text{O}_5\text{F}$ -III (b)  $\text{CaB}_3\text{O}_5\text{F}$ -II.

Figure S3. Band structure and Density of states for  $\text{CaB}_3\text{O}_5\text{F}$ -I-III. (a, d)  $\text{CaB}_3\text{O}_5\text{F}$ -I, (b, e)  
 $\text{CaB}_3\text{O}_5\text{F}$ -II, (c, f)  $\text{CaB}_3\text{O}_5\text{F}$ -III.

Figure S4. (a) The dihedral angles  $\alpha$  between adjacent  $\text{BO}_3$  groups, (b) the dihedral angles  $\beta$   
between adjacent  $\text{BO}_3$  and  $\text{BO}_3\text{F}$  groups, the orientation of  $\text{BO}_3$  in the basic building block (c)  
 $\text{CaB}_3\text{O}_5\text{F}$ -IV (d)  $\text{CaB}_6\text{O}_9\text{F}_2$ -I.

Table S1. Basic parameters and  $E_{\text{hull}}$  of  $\text{CaB}_6\text{O}_9\text{F}_2$ -I and  $\text{CaB}_3\text{O}_5\text{F}$ -I-IV.

| Structure                             | Space group         | $E_{\text{hull}}$ (eV/atom) |
|---------------------------------------|---------------------|-----------------------------|
| $\text{CaB}_6\text{O}_9\text{F}_2$ -I | $C2(\text{no.}5)$   | 0.0094                      |
| $\text{CaB}_3\text{O}_5\text{F}$ -I   | $P2_1(\text{no.}4)$ | 0.0442                      |
| $\text{CaB}_3\text{O}_5\text{F}$ -II  | $Pc(\text{no.}7)$   | 0.0297                      |
| $\text{CaB}_3\text{O}_5\text{F}$ -III | $P2_1(\text{no.}4)$ | 0.0250                      |
| $\text{CaB}_3\text{O}_5\text{F}$ -IV  | $Pc(\text{no.}7)$   | 0.0400                      |

The structural rationality of CaB<sub>6</sub>O<sub>9</sub>F<sub>2</sub>-I and CaB<sub>3</sub>O<sub>5</sub>F-I-IV are also evident from bond valence sum (BVS) calculations and global instability index (GII). Global instability index (GII) with well determined structures is usually < 0.1 valence unit (v.u.), 0.1 < GII < 0.2 v.u. indicating a strained structure, while structures with GII > 0.2 v.u. are uncommon and be considered unstable. The BVS and GII values (Tables S2) indicate that the coordination of atoms in unit cell of CaB<sub>6</sub>O<sub>9</sub>F<sub>2</sub>-I and CaB<sub>3</sub>O<sub>5</sub>F-I-IV are correct and feasible.

Table S2-I. Crystallographic structural data of CaB<sub>6</sub>O<sub>9</sub>F<sub>2</sub>-I.

| CaB <sub>6</sub> O <sub>9</sub> F <sub>2</sub> -I (C2) |              |              |              |              |              |
|--------------------------------------------------------|--------------|--------------|--------------|--------------|--------------|
| Cell parameters                                        |              |              |              |              |              |
| <i>a</i> (Å)                                           | <i>b</i> (Å) | <i>c</i> (Å) | <i>α</i> (°) | <i>β</i> (°) | <i>γ</i> (°) |
| 7.9355                                                 | 8.9531       | 10.6472      | 90.0000      | 141.0695     | 90.0000      |
| Fractional coordinates                                 |              |              |              |              |              |
| Atoms                                                  | <i>x/a</i>   | <i>y/b</i>   | <i>z/c</i>   |              |              |
| Ca1                                                    | 0.30540      | 0.69460      | 0.50000      |              |              |
| B1                                                     | 0.75681      | 0.97200      | 0.26955      |              |              |
| B2                                                     | 0.02800      | 0.24319      | 0.73045      |              |              |
| B3                                                     | 0.12090      | 0.22625      | 0.36392      |              |              |
| B4                                                     | 0.77375      | 0.87910      | 0.63608      |              |              |
| B5                                                     | 0.22952      | 0.45388      | 0.05148      |              |              |
| B6                                                     | 0.54612      | 0.77048      | 0.94852      |              |              |
| O1                                                     | 0.89811      | 0.16519      | 0.29302      |              |              |
| O2                                                     | 0.83481      | 0.10189      | 0.70698      |              |              |
| O3                                                     | 0.09898      | 0.31245      | 0.92247      |              |              |
| O4                                                     | 0.68755      | 0.90102      | 0.07753      |              |              |
| O5                                                     | 0.24106      | 0.40912      | 0.25136      |              |              |
| O6                                                     | 0.59088      | 0.75894      | 0.74864      |              |              |
| O7                                                     | 0.15542      | 0.31721      | 0.57301      |              |              |
| O8                                                     | 0.68279      | 0.84458      | 0.42699      |              |              |
| O9                                                     | 0.34568      | 0.65432      | 0.00000      |              |              |
| F1                                                     | 0.97257      | 0.75567      | 0.64907      |              |              |
| F2                                                     | 0.24433      | 0.02743      | 0.35093      |              |              |
| Bond valence sum (BVS)                                 |              |              |              | GII          |              |
| Ca1                                                    | 1.8976       | B1           | 3.0334       | 0.083        |              |
| B2                                                     | 3.0325       | B3           | 2.9819       |              |              |
| B4                                                     | 2.9833       | B5           | 3.0435       |              |              |
| B6                                                     | 3.0454       | O1           | -1.9796      |              |              |
| O2                                                     | -1.9796      | O3           | -2.0550      |              |              |
| O4                                                     | -2.0568      | O5           | -2.1023      |              |              |

|    |         |    |         |
|----|---------|----|---------|
| O6 | -2.1022 | O7 | -2.0267 |
| O8 | -2.0269 | O9 | -1.9844 |
| F1 | -0.8524 | F2 | -0.8522 |

Table S2-II. Crystallographic structural data of CaB<sub>3</sub>O<sub>5</sub>F-I.

| CaB <sub>3</sub> O <sub>5</sub> F-I ( <i>P2<sub>1</sub></i> ) |              |              |              |             |              |
|---------------------------------------------------------------|--------------|--------------|--------------|-------------|--------------|
| Cell parameters                                               |              |              |              |             |              |
| <i>a</i> (Å)                                                  | <i>b</i> (Å) | <i>c</i> (Å) | $\alpha$ (°) | $\beta$ (°) | $\gamma$ (°) |
| 4.5599                                                        | 8.7793       | 6.6902       | 90.0000      | 96.9681     | 90.0000      |
| Fractional coordinates                                        |              |              |              |             |              |
| Atoms                                                         | <i>x/a</i>   | <i>y/b</i>   | <i>z/c</i>   |             |              |
| Ca1                                                           | 0.1728       | 0.0384       | 0.1129       |             |              |
| B1                                                            | 0.0612       | 0.0199       | 0.0539       |             |              |
| B2                                                            | 0.1694       | 0.0300       | 0.0457       |             |              |
| B3                                                            | 0.0854       | 0.0252       | 0.0036       |             |              |
| O1                                                            | 0.1255       | 0.0262       | 0.0653       |             |              |
| O2                                                            | 0.1491       | 0.0312       | 0.0151       |             |              |
| O3                                                            | 0.0124       | 0.0326       | 0.0578       |             |              |
| O4                                                            | 0.0577       | 0.0138       | 0.0225       |             |              |
| O5                                                            | 0.0615       | 0.0309       | 0.1262       |             |              |
| F1                                                            | 0.0496       | 0.0042       | 0.0707       |             |              |
| Bond valence sum (BVS)                                        |              |              |              | GII         |              |
| Ca1                                                           | 1.8937       | B1           | 3.0145       | 0.084       |              |
| B2                                                            | 3.0020       | B3           | 2.9651       |             |              |
| O1                                                            | -2.0796      | O2           | -2.0448      |             |              |
| O3                                                            | -1.8824      | O4           | -1.9885      |             |              |
| O5                                                            | -1.8262      | F1           | -0.9284      |             |              |

Table S2-III. Crystallographic structural data of CaB<sub>3</sub>O<sub>5</sub>F-II.

| CaB <sub>3</sub> O <sub>5</sub> F-II ( <i>Pc</i> ) |              |              |              |             |              |
|----------------------------------------------------|--------------|--------------|--------------|-------------|--------------|
| Cell parameters                                    |              |              |              |             |              |
| <i>a</i> (Å)                                       | <i>b</i> (Å) | <i>c</i> (Å) | $\alpha$ (°) | $\beta$ (°) | $\gamma$ (°) |
| 5.9346                                             | 5.5199       | 10.6694      | 90.0000      | 133.4949    | 90.0000      |
| Fractional coordinates                             |              |              |              |             |              |
| Atoms                                              | <i>x/a</i>   | <i>y/b</i>   | <i>z/c</i>   |             |              |
| Ca1                                                | - 0.0464     | - 0.1625     | 0.0027       |             |              |
| B1                                                 | 0.1980       | - 0.0261     | 0.0828       |             |              |
| B2                                                 | - 0.0946     | - 0.0614     | 0.0149       |             |              |
| B3                                                 | 0.1516       | - 0.0781     | 0.0854       |             |              |
| O1                                                 | 0.2012       | - 0.1792     | 0.0746       |             |              |

|                        |          |          |         |
|------------------------|----------|----------|---------|
| O2                     | - 0.0493 | - 0.0639 | 0.0311  |
| O3                     | - 0.1351 | - 0.0896 | 0.0075  |
| O4                     | 0.1561   | - 0.0549 | 0.0752  |
| O5                     | - 0.0974 | - 0.0453 | 0.0615  |
| F1                     | 0.2948   | - 0.0473 | 0.0883  |
| Bond valence sum (BVS) |          |          | GII     |
| Ca1                    | 1.7757   | B1       | 2.9656  |
| B2                     | 2.9784   | B3       | 2.9790  |
| O1                     | -1.8722  | O2       | -2.0405 |
| O3                     | -1.8566  | O4       | -1.9508 |
| O5                     | -2.0475  | F1       | -0.9113 |
|                        |          |          | 0.082   |

Table S2-IV. Crystallographic structural data of CaB<sub>3</sub>O<sub>5</sub>F-III.

| CaB <sub>3</sub> O <sub>5</sub> F-III ( <i>P</i> <sub>2</sub> <sub>1</sub> ) |              |              |              |             |              |
|------------------------------------------------------------------------------|--------------|--------------|--------------|-------------|--------------|
| Cell parameters                                                              |              |              |              |             |              |
| <i>a</i> (Å)                                                                 | <i>b</i> (Å) | <i>c</i> (Å) | $\alpha$ (°) | $\beta$ (°) | $\gamma$ (°) |
| 5.3192                                                                       | 6.8636       | 6.8982       | 90.0000      | 110.0409    | 90.0000      |
| Fractional coordinates                                                       |              |              |              |             |              |
| Atoms                                                                        | <i>x/a</i>   | <i>y/b</i>   | <i>z/c</i>   |             |              |
| Ca1                                                                          | 0.1061       | 0.0425       | 0.1365       |             |              |
| B1                                                                           | 0.1353       | 0.0148       | 0.0558       |             |              |
| B2                                                                           | 0.0012       | 0.0847       | 0.0369       |             |              |
| B3                                                                           | 0.1068       | 0.1329       | 0.0899       |             |              |
| O1                                                                           | 0.1820       | 0.0184       | 0.0792       |             |              |
| O2                                                                           | 0.1463       | 0.0842       | 0.0138       |             |              |
| O3                                                                           | 0.1065       | 0.0405       | 0.0450       |             |              |
| O4                                                                           | 0.1036       | 0.1373       | 0.0609       |             |              |
| O5                                                                           | 0.1405       | 0.0039       | 0.1125       |             |              |
| F1                                                                           | 0.0424       | 0.0781       | 0.1164       |             |              |
| Bond valence sum (BVS)                                                       |              |              | GII          |             |              |
| Ca1                                                                          | 1.8281       | B1           | 2.9843       |             |              |
| B2                                                                           | 2.9562       | B3           | 2.9736       |             |              |
| O1                                                                           | -1.8958      | O2           | -1.9105      |             |              |
| O3                                                                           | -2.0711      | O4           | -1.9382      |             |              |
| O5                                                                           | -1.9642      | F1           | -0.9624      |             |              |
|                                                                              |              |              | 0.084        |             |              |

Table S2-V. Crystallographic structural data of CaB<sub>3</sub>O<sub>5</sub>F-IV.

| CaB <sub>3</sub> O <sub>5</sub> F-IV ( <i>Pc</i> ) |                        |              |              |             |              |
|----------------------------------------------------|------------------------|--------------|--------------|-------------|--------------|
| Cell parameters                                    |                        |              |              |             |              |
| <i>a</i> (Å)                                       | <i>b</i> (Å)           | <i>c</i> (Å) | $\alpha$ (°) | $\beta$ (°) | $\gamma$ (°) |
| 5.9639                                             | 9.2592                 | 4.8890       | 90.0000      | 101.0361    | 90.0000      |
| Fractional coordinates                             |                        |              |              |             |              |
| Atoms                                              | <i>x/a</i>             | <i>y/b</i>   | <i>z/c</i>   |             |              |
| Ca1                                                | 0.1029                 | 0.0909       | 0.1705       |             |              |
| B1                                                 | 0.0627                 | 0.0906       | 0.0565       |             |              |
| B2                                                 | 0.1407                 | 0.0766       | 0.1939       |             |              |
| B3                                                 | 0.0071                 | 0.0798       | 0.0892       |             |              |
| O1                                                 | 0.0444                 | 0.0887       | 0.0008       |             |              |
| O2                                                 | 0.1574                 | 0.0789       | 0.1362       |             |              |
| O3                                                 | 0.0464                 | 0.0835       | 0.0993       |             |              |
| O4                                                 | 0.0961                 | 0.0982       | 0.0706       |             |              |
| O5                                                 | 0.1561                 | 0.0785       | 0.0328       |             |              |
| F1                                                 | 0.0310                 | 0.0618       | 0.1983       |             |              |
|                                                    | Bond valence sum (BVS) |              |              |             | GII          |
| Ca1                                                | 1.9403                 | B1           | 2.9794       | 0.092       |              |
| B2                                                 | 2.8599                 | B3           | 2.8327       |             |              |
| O1                                                 | -2.0341                | O2           | -1.9463      |             |              |
| O3                                                 | -2.0830                | O4           | -1.9246      |             |              |
| O5                                                 | -1.8904                | F1           | -0.9340      |             |              |

Table S3-I. Bond lengths (Å) and angles (°) for CaB<sub>6</sub>O<sub>9</sub>F<sub>2</sub>-I.

|                |          |                |          |
|----------------|----------|----------------|----------|
| B(2)-O(1)      | 1.3488   | B(4)-O(8)      | 1.4837   |
| B(1)-O(4)      | 1.3746   | B(5)-O(3)      | 1.3478   |
| B(1)-O(8)      | 1.3778   | B(5)-O(5)      | 1.3759   |
| B(2)-O(2)      | 1.3492   | B(5)-O(9)      | 1.3739   |
| B(2)-O(3)      | 1.3746   | B(6)-O(4)      | 1.3472   |
| B(2)-O(7)      | 1.3779   | B(6)-O(6)      | 1.3759   |
| B(3)-F(2)      | 1.4813   | B(6)-O(9)      | 1.3739   |
| B(3)-O(1)      | 1.4028   | Ca(1)-F(1)     | 2.3261   |
| B(3)-O(5)      | 1.4799   | Ca(1)-F(2)     | 2.3262   |
| B(3)-O(7)      | 1.4837   | Ca(1)-O(5)     | 2.3341   |
| B(4)-F(1)      | 1.4812   | Ca(1)-O(6)     | 2.3341   |
| B(4)-O(2)      | 1.4023   | Ca(1)-O(7)     | 2.4029   |
| B(4)-O(6)      | 1.4799   | Ca(1)-O(8)     | 2.4029   |
| O(1)-B(1)-O(4) | 117.2362 | O(4)-B(1)-O(8) | 119.5199 |
| O(8)-B(1)-O(1) | 123.2400 | F(1)-B(4)-O(2) | 109.3331 |
| O(8)-B(4)-F(1) | 106.2333 | O(2)-B(4)-F(1) | 109.3331 |
| O(6)-B(4)-O(8) | 101.9472 | O(6)-B(6)-O(9) | 115.5202 |
| O(9)-B(6)-O(4) | 124.1534 | O(4)-B(6)-O(6) | 120.1893 |
| O(3)-B(5)-O(9) | 124.1534 | O(9)-B(5)-O(5) | 115.5203 |
| O(5)-B(5)-O(3) | 120.1893 | O(5)-B(3)-F(2) | 108.8772 |
| F(2)-B(3)-O(7) | 106.2333 | O(7)-B(3)-O(1) | 117.0522 |
| O(7)-B(2)-O(3) | 119.5199 | O(3)-B(2)-O(2) | 117.2362 |
| O(2)-B(2)-O(7) | 123.2400 |                |          |

Table S3-II. Bond lengths (Å) and angles (°) for CaB<sub>3</sub>O<sub>5</sub>F-I.

|           |        |            |        |
|-----------|--------|------------|--------|
| B(1)-O(3) | 1.4339 | Ca(1)-O(5) | 2.5259 |
| B(1)-O(1) | 1.4575 | Ca(1)-O(1) | 2.4268 |
| B(1)-O(4) | 1.4769 | Ca(1)-O(2) | 2.4875 |
| B(1)-F(1) | 1.4529 | Ca(1)-O(4) | 2.5834 |
| B(2)-O(2) | 1.3846 | Ca(1)-O(5) | 2.3261 |
| B(2)-O(1) | 1.3712 | Ca(1)-F(1) | 2.3243 |
| B(2)-O(3) | 1.3569 |            |        |
| B(3)-O(2) | 1.4373 |            |        |
| B(3)-O(4) | 1.3907 |            |        |

|                |          |                |          |
|----------------|----------|----------------|----------|
| B(3)-O(5)      | 1.3202   |                |          |
| O(3)-B(1)-F(1) | 109.8449 | O(2)-B(3)-O(4) | 114.6244 |
| F(1)-B(1)-O(1) | 107.6098 | O(2)-B(3)-O(5) | 116.5123 |
| O(1)-B(1)-O(4) | 112.0899 | O(4)-B(3)-O(5) | 128.8558 |
| O(3)-B(1)-O(4) | 112.1010 |                |          |
| O(1)-B(2)-O(3) | 116.9338 |                |          |
| O(3)-B(2)-O(2) | 123.1575 |                |          |
| O(2)-B(2)-O(1) | 119.9053 |                |          |

Table S3-III. Bond lengths (Å) and angles (°) for CaB<sub>3</sub>O<sub>5</sub>F-II.

|                |          |                |          |
|----------------|----------|----------------|----------|
| B(1)-O(1)      | 1.3246   | Ca(1)-O(1)     | 2.3588   |
| B(1)-O(6)      | 1.3916   | Ca(1)-O(5)     | 2.3136   |
| B(1)-O(9)      | 1.4157   | Ca(1)-O(2)     | 2.4608   |
| B(2)-O(2)      | 1.3799   | Ca(1)-O(6)     | 2.5174   |
| B(2)-O(5)      | 1.3534   | Ca(1)-O(9)     | 2.5143   |
| B(2)-O(9)      | 1.3887   | Ca(1)-F(1)     | 2.2636   |
| B(3)-O(6)      | 1.4634   |                |          |
| B(3)-O(2)      | 1.4531   |                |          |
| B(3)-O(5)      | 1.4499   |                |          |
| B(3)-F(1)      | 1.4754   |                |          |
| O(6)-B(1)-O(1) | 122.5140 | O(2)-B(3)-O(5) | 108.9081 |
| O(1)-B(1)-O(9) | 118.5213 | O(5)-B(3)-F(1) | 106.5286 |
| O(9)-B(1)-O(6) | 118.9394 | F(1)-B(3)-O(6) | 106.5290 |
| O(9)-B(2)-O(5) | 120.0296 |                |          |
| O(5)-B(2)-O(2) | 123.3818 |                |          |
| O(2)-B(2)-O(9) | 116.5878 |                |          |
| O(6)-B(3)-O(2) | 113.6844 |                |          |

Table S3-IV. Bond lengths (Å) and angles (°) for CaB<sub>3</sub>O<sub>5</sub>F-III.

|           |        |            |        |
|-----------|--------|------------|--------|
| B(1)-O(4) | 1.4827 | Ca(1)-O(5) | 2.5132 |
| B(1)-O(1) | 1.4167 | Ca(1)-O(2) | 2.3354 |
| B(1)-O(3) | 1.4520 | Ca(1)-O(1) | 2.2859 |
| B(1)-F(1) | 1.4971 | Ca(1)-O(3) | 2.5409 |
| B(2)-O(5) | 1.4419 | Ca(1)-O(4) | 2.5794 |
| B(2)-O(1) | 1.3666 | Ca(1)-F(1) | 2.4071 |

|                |          |                |          |
|----------------|----------|----------------|----------|
| B(2)-O(2)      | 1.3295   | Ca(1)-F(1)     | 2.4610   |
| B(3)-O(3)      | 1.3509   |                |          |
| B(3)-O(4)      | 1.3682   |                |          |
| B(3)-O(5)      | 1.4058   |                |          |
| O(1)-B(1)-F(1) | 108.2616 | O(5)-B(3)-O(3) | 114.7298 |
| F(1)-B(1)-O(3) | 101.0400 | O(3)-B(3)-O(4) | 126.6769 |
| O(3)-B(1)-O(4) | 112.0450 | O(4)-B(3)-O(5) | 118.5734 |
| O(4)-B(1)-O(1) | 114.4109 |                |          |
| O(1)-B(2)-O(2) | 125.2954 |                |          |
| O(1)-B(2)-O(5) | 115.1986 |                |          |
| O(5)-B(2)-O(2) | 119.5000 |                |          |

Table S3-V. Bond lengths (Å) and angles (°) for CaB<sub>3</sub>O<sub>5</sub>F-IV.

|                |          |                |          |
|----------------|----------|----------------|----------|
| B(1)-O(1)      | 1.3754   | Ca(1)-O(1)     | 2.3914   |
| B(1)-O(3)      | 1.4041   | Ca(1)-O(2)     | 2.4754   |
| B(1)-O(4)      | 1.3436   | Ca(1)-O(3)     | 2.4581   |
| B(2)-O(5)      | 1.5153   | Ca(1)-O(4)     | 2.4351   |
| B(2)-O(1)      | 1.4882   | Ca(1)-O(4)     | 2.6337   |
| B(2)-O(2)      | 1.4923   | Ca(1)-O(4)     | 2.3056   |
| B(2)-F(1)      | 1.3954   | Ca(1)-O(5)     | 2.4699   |
| B(3)-O(3)      | 1.4086   |                |          |
| B(3)-O(2)      | 1.3812   |                |          |
| B(3)-O(5)      | 1.3874   |                |          |
| O(1)-B(1)-O(4) | 122.1087 | O(3)-B(3)-O(5) | 117.2583 |
| O(4)-B(1)-O(3) | 119.7574 | O(5)-B(3)-O(2) | 125.5862 |
| O(3)-B(1)-O(1) | 118.0746 | O(2)-B(3)-O(3) | 116.9749 |
| O(1)-B(2)-F(1) | 109.4056 |                |          |
| F(1)-B(2)-O(2) | 110.7169 |                |          |
| O(2)-B(2)-O(5) | 107.6461 |                |          |
| O(5)-B(2)-O(1) | 107.9252 |                |          |

Table S4. Comparison of key NLO properties between the predicted structures and representative UV/DUV materials.

| Compounds                                         | $E_g$ (eV) | $\Delta n$    | Max. $ d_{ij} $<br>(pm V <sup>-1</sup> ) | $\lambda_{PM}$ (nm) |
|---------------------------------------------------|------------|---------------|------------------------------------------|---------------------|
| CaB <sub>6</sub> O <sub>9</sub> F <sub>2</sub> -I | 7.632      | 0.101@1064 nm | 0.235                                    | 162                 |
| CaB <sub>3</sub> O <sub>5</sub> F-IV              | 6.979      | 0.085@1064 nm | 1.124                                    | 192                 |
| KBBF                                              | 8.45       | 0.088@1064 nm | 0.47                                     | 161                 |
| $\beta$ -BBO                                      | 6.56       | 0.113@1064 nm | 1.60                                     | 205                 |
| LBO                                               | 7.75       | 0.04@400 nm   | 1.05                                     | 276                 |

Table S5.  $\Delta\rho^b$ , group contribution and corresponding birefringence of  $\text{CaB}_6\text{O}_9\text{F}_2$ -I and  $\text{CaB}_3\text{O}_5\text{F}$ -I-IV.

| Structures                            | Groups                     | $\Delta\rho^b (\times 10^{-2})$ | Group contribution | Birefringence |
|---------------------------------------|----------------------------|---------------------------------|--------------------|---------------|
| $\text{CaB}_6\text{O}_9\text{F}_2$ -I | $[\text{CaO}_4\text{F}_2]$ | 0.0811                          | 2.87%              | 0.101         |
|                                       | $[\text{BO}_3]$            | 2.4466                          | 86.67%             |               |
|                                       | $[\text{BO}_3\text{F}]$    | 0.2953                          | 2.82%              |               |
| $\text{CaB}_3\text{O}_5\text{F}$ -I   | $[\text{CaO}_5\text{F}]$   | 0.0731                          | 4.04%              | 0.081         |
|                                       | $[\text{BO}_3]$            | 1.6725                          | 92.34%             |               |
|                                       | $[\text{BO}_3\text{F}]$    | 0.0656                          | 3.62%              |               |
| $\text{CaB}_3\text{O}_5\text{F}$ -II  | $[\text{CaO}_5\text{F}]$   | 0.1462                          | 9.93%              | 0.065         |
|                                       | $[\text{BO}_3]$            | 1.1882                          | 80.67%             |               |
|                                       | $[\text{BO}_3\text{F}]$    | 0.1385                          | 9.40%              |               |
| $\text{CaB}_3\text{O}_5\text{F}$ -III | $[\text{CaO}_5\text{F}_2]$ | -0.0880                         | -5.16%             | 0.052         |
|                                       | $[\text{BO}_3]$            | 1.7103                          | 99.95%             |               |
|                                       | $[\text{BO}_3\text{F}]$    | 0.0892                          | 5.21%              |               |
| $\text{CaB}_3\text{O}_5\text{F}$ -IV  | $[\text{CaO}_7]$           | 0.0621                          | 3.42%              | 0.085         |
|                                       | $[\text{BO}_3]$            | 1.8065                          | 99.43%             |               |
|                                       | $[\text{BO}_3\text{F}]$    | -0.0520                         | -2.84%             |               |

Table S6. Contributions of the respective groups to birefringence and SHG coefficients in  $\text{CaB}_6\text{O}_9\text{F}_2$ -I and  $\text{CaB}_3\text{O}_5\text{F}$ -I~IV.

| Structures                                                     |                           | $\Delta n$ | $ d_{ij} $ |
|----------------------------------------------------------------|---------------------------|------------|------------|
| $\text{CaB}_6\text{O}_9\text{F}_2$ -I ( <i>C2</i> )            | [B-O/F] anionic framework | 0.098      | 0.239      |
|                                                                | $\text{Ca}^{2+}$          | 0.007      | 0.012      |
| $\text{CaB}_3\text{O}_5\text{F}$ -I ( <i>P2<sub>1</sub></i> )  | [B-O/F] anionic framework | 0.065      | 0.345      |
|                                                                | $\text{Ca}^{2+}$          | 0.01       | 0.091      |
| $\text{CaB}_3\text{O}_5\text{F}$ -II ( <i>Pc</i> )             | [B-O/F] anionic framework | 0.041      | 0.712      |
|                                                                | $\text{Ca}^{2+}$          | 0.018      | 0.138      |
| $\text{CaB}_3\text{O}_5\text{F}$ -III( <i>P2<sub>1</sub></i> ) | [B-O/F] anionic framework | 0.057      | 0.484      |
|                                                                | $\text{Ca}^{2+}$          | 0.002      | 0.072      |
| $\text{CaB}_3\text{O}_5\text{F}$ -IV ( <i>Pc</i> )             | [B-O/F] anionic framework | 0.067      | 0.889      |
|                                                                | $\text{Ca}^{2+}$          | 0.006      | 0.042      |

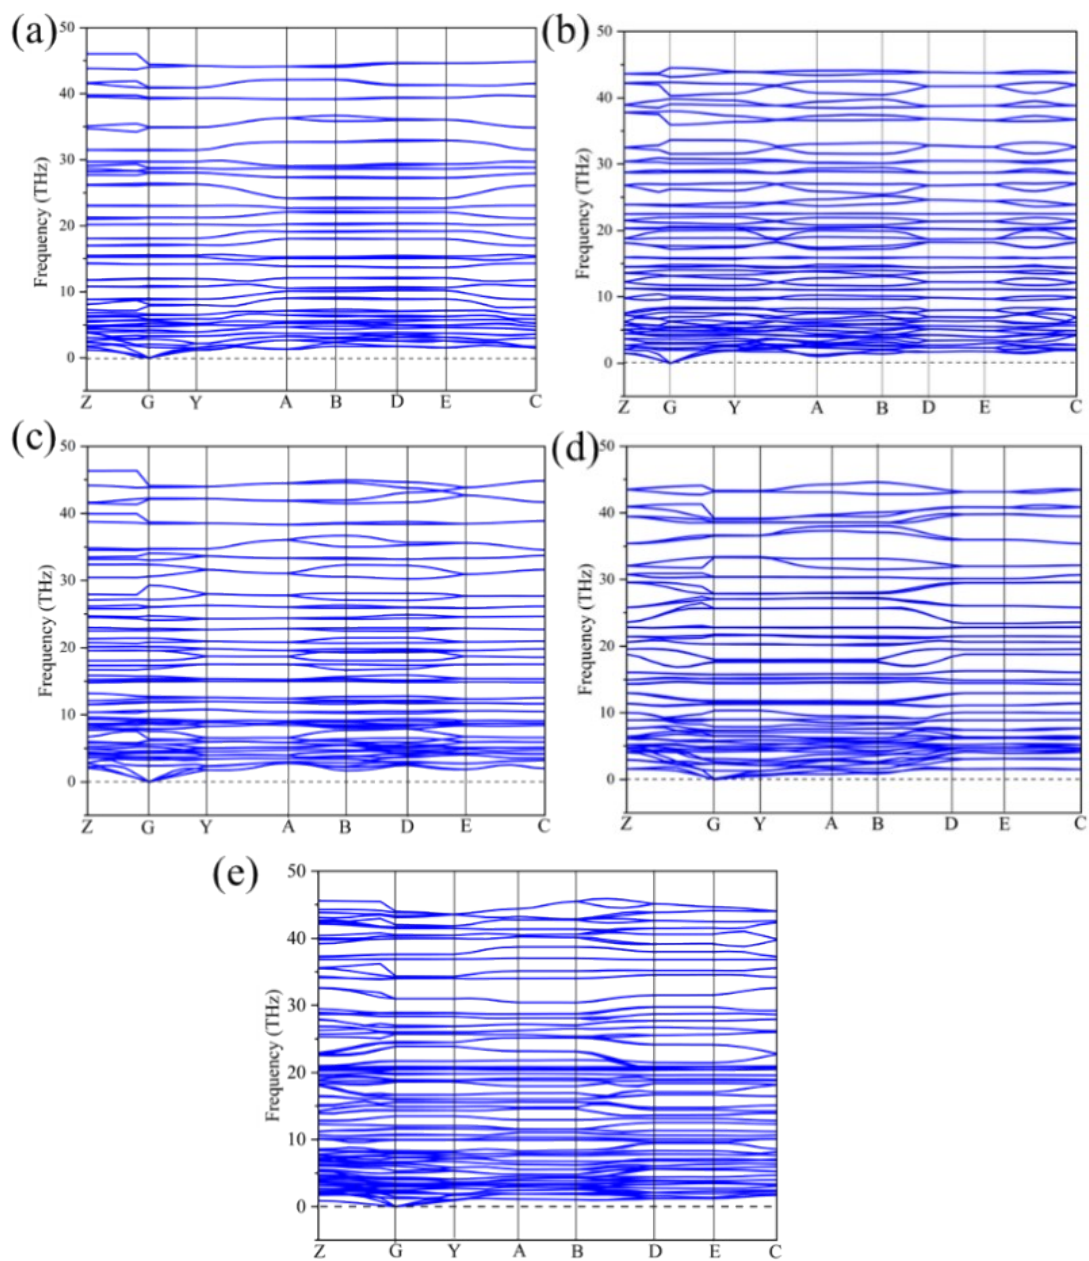

Figure S1. Phonon spectra of (a)  $\text{CaB}_3\text{O}_5\text{F-I}$ , (b)  $\text{CaB}_3\text{O}_5\text{F-II}$ , (c)  $\text{CaB}_3\text{O}_5\text{F-III}$ , (d)  $\text{CaB}_3\text{O}_5\text{F-IV}$ , and (e)  $\text{CaB}_6\text{O}_9\text{F}_2\text{-I}$ .

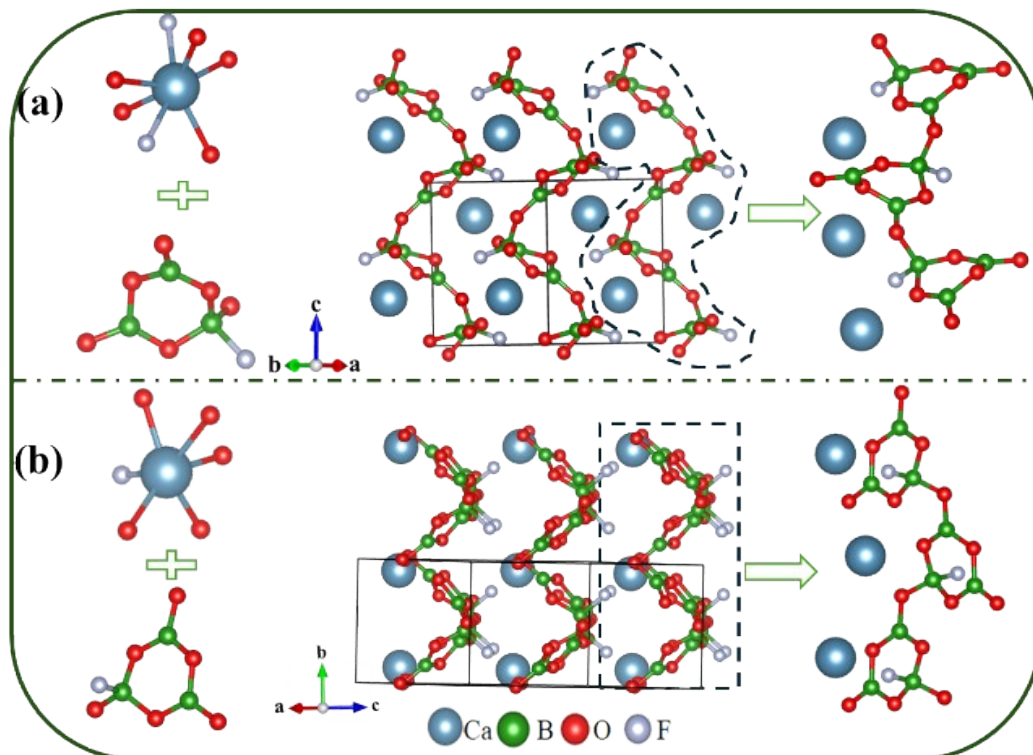

Figure S2. Fluorooxoborates structures of (a)  $\text{CaB}_3\text{O}_5\text{F-III}$  (b)  $\text{CaB}_3\text{O}_5\text{F-II}$ .

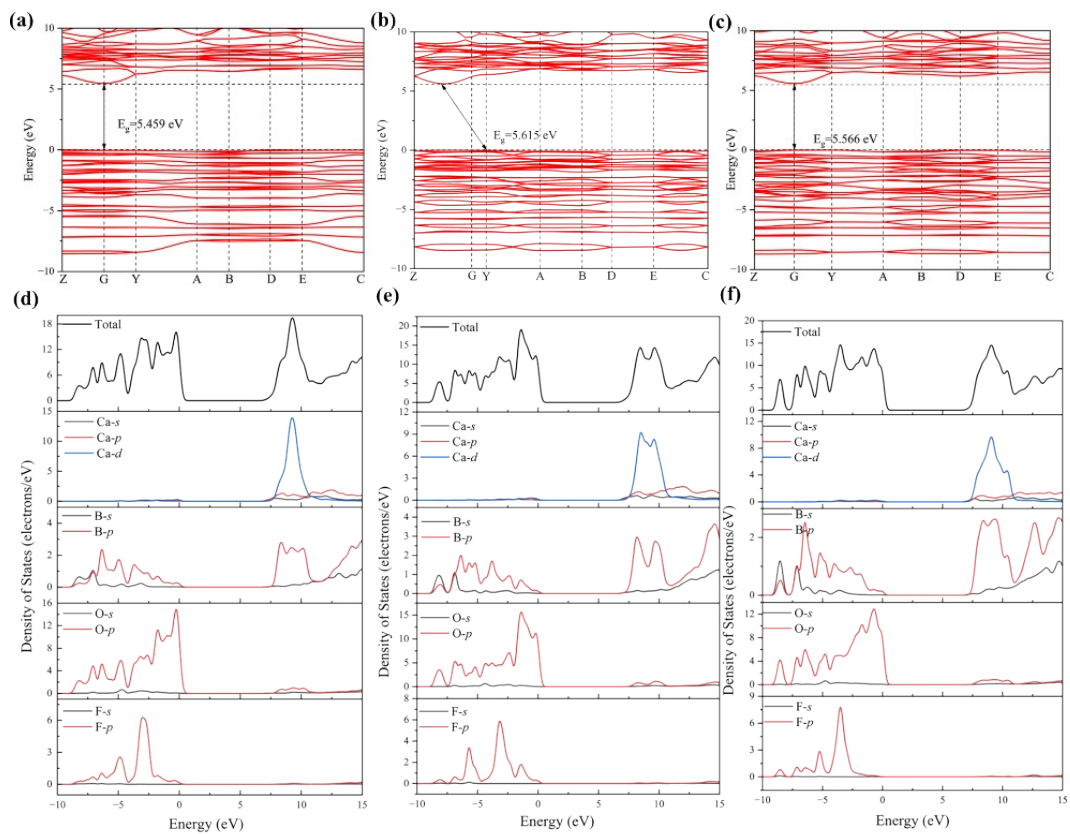

Figure S3. Band structure and Density of states for  $\text{CaB}_3\text{O}_5\text{F}$ -I-III. (a, d)  $\text{CaB}_3\text{O}_5\text{F}$ -I, (b, e)  $\text{CaB}_3\text{O}_5\text{F}$ -II, (c, f)  $\text{CaB}_3\text{O}_5\text{F}$ -III.

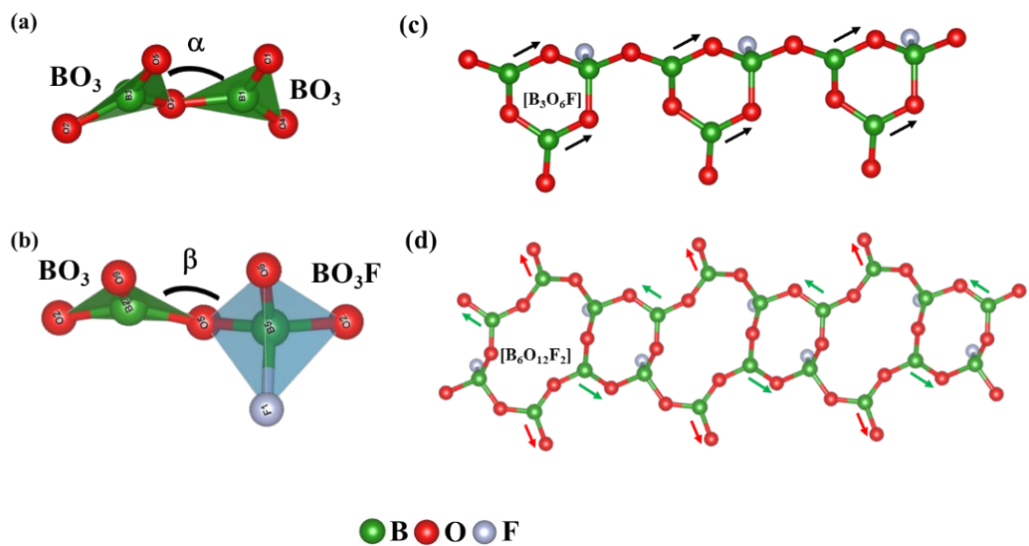

Figure S4. (a) Dihedral angles  $\alpha$  between adjacent  $\text{BO}_3$  groups, (b) the dihedral angles  $\beta$  between adjacent  $\text{BO}_3$  and  $\text{BO}_3\text{F}$  groups, the orientation of  $\text{BO}_3$  in the basic building block (c)  $\text{CaB}_3\text{O}_5\text{F-IV}$  (d)  $\text{CaB}_6\text{O}_9\text{F}_2\text{-I}$ .
